# Supplementary material
Source: MDPI journal article supplement (https://www.mdpi.com/2225-1154/5/1/4)
Supplement: s1 [file s1]

Supplementary Materials: Rising Precipitation Extremes across Nepal. *Climate* 2017, *5*, 4.

Ramchandra Karki, Shabeh ul Hasson, Udo Schickhoff, Thomas Scholten and Jürgen Böhner

**Table S1.** Station wise significance of extreme indices and field significance (period 1970–2012).

| **Region** | **ID** | **Name** | **Lat  (o)** | **Lon  (o)** | **Height  (m)** | **R95** | **RX1day** | **RX5day** | **R10** | **R20** | **CDD** | **CWD** | **PRCPTOT** | **SDII** | **WD** | **Pre-Monsoon** | **Monsoon** | **Post Monsoon** | **Winter** |
| --- | --- | --- | --- | --- | --- | --- | --- | --- | --- | --- | --- | --- | --- | --- | --- | --- | --- | --- | --- |
| **WL** | 106 | Belauri santipur | 28.683 | 80.35 | 159 | **7.64** | 1.23 | 0.30 | **−0.21** | −0.05 | ***0.78*** | −0.05 | 3.62 | 0.10 | −0.13 | −0.33 | 1.14 | −0.26 | −0.46 |
| 209 | Dhangadhi (atariya) | 28.8 | 80.55 | 187 | ***11.01*** | 1.60 | ***2.76*** | 0.00 | −0.02 | −0.42 | −0.07 | 7.02 | 0.05 | 0.05 | **1.65** | 7.77 | −0.45 | 0.11 |
| 416 | Nepalgunj Reg.off. | 28.052 | 81.523 | 144 | −5.15 | 0.12 | −0.66 | −0.10 | −0.09 | **1.49** | 0.00 | −7.70 | 0.00 | **−0.48** | 0.63 | −0.03 | −0.04 | −0.19 |
| 510 | Koilabas | 27.7 | 82.533 | 320 | 2.88 | 0.42 | 1.75 | −0.03 | 0.00 | **0.96** | 0.00 | 2.96 | 0.09 | −0.14 | **1.23** | 2.12 | −0.78 | −0.12 |
| **Field Significance of WL** | | | | | | * | * | * | * | * | 1.20 | * | * | * | −0.50 | 1.67 | * | * | * |
| **WM** | 101 | Kakerpakha | 29.65 | 80.5 | 842 | −0.49 | −0.24 | −0.25 | −0.14 | 0.00 | −0.35 | 0.05 | −1.88 | −0.04 | 0.09 | 0.25 | −0.61 | ***−1.09*** | −1.03 |
| 103 | Patan (west) | 29.467 | 80.533 | 1266 | 3.45 | 0.46 | 0.41 | −0.09 | 0.00 | 0.35 | 0.00 | 1.36 | −0.01 | 0.10 | −0.84 | 1.28 | −0.12 | −0.68 |
| 104 | Dadeldhura | 29.3 | 80.583 | 1848 | ***6.54*** | ***1.38*** | 1.41 | −0.16 | −0.07 | 0.05 | ***−0.15*** | 0.62 | 0.01 | −0.20 | −0.71 | 0.66 | −0.13 | −0.80 |
| 201 | Pipalkot | 29.617 | 80.867 | 1456 | ***12.93*** | 0.67 | 1.60 | −0.09 | ***0.31*** | 0.15 | 0.13 | ***10.64*** | ***0.11*** | −0.20 | −0.92 | ***11.52*** | **−0.89** | ***−1.33*** |
| 202 | Chainpur(west) | 29.55 | 81.217 | 1304 | ***7.72*** | ***0.49*** | 0.36 | −0.03 | 0.05 | −0.32 | ***0.22*** | ***5.90*** | 0.03 | 0.09 | 0.18 | ***6.39*** | −0.70 | 0.11 |
| 203 | Silgadhi doti | 29.267 | 80.983 | 1360 | 4.09 | 0.11 | 1.36 | 0.10 | **0.17** | −0.09 | ***0.10*** | ***7.90*** | 0.10 | −0.42 | −1.02 | 4.78 | 0.14 | −1.15 |
| 206 | Asara ghat | 28.953 | 81.442 | 650 | 1.03 | −0.36 | −0.51 | 0.08 | 0.07 | **0.81** | ***−0.12*** | −1.77 | ***0.21*** | ***−0.97*** | 0.89 | −0.34 | −0.30 | −0.60 |
| 303 | Jumla | 29.275 | 82.18 | 2366 | −0.99 | −0.17 | −0.09 | −0.08 | ***−0.08*** | −0.11 | **0.11** | −1.67 | ***−0.04*** | **0.39** | −0.64 | 1.68 | −0.52 | −0.84 |
| 308 | Nagma | 29.2 | 81.9 | 1905 | 1.17 | 0.34 | ***0.92*** | −0.01 | 0.00 | 0.28 | 0.00 | 1.52 | ***0.04*** | ***−0.39*** | 0.67 | 1.78 | −0.55 | −0.50 |
| 402 | Dailekh | 28.85 | 81.717 | 1402 | −2.01 | −0.31 | −0.09 | −0.14 | −0.07 | 0.74 | 0.07 | −4.76 | 0.02 | **−0.39** | −0.50 | −1.51 | ***−1.15*** | ***−1.30*** |
| 404 | Jajarkot | 28.7 | 82.2 | 1231 | ***4.43*** | **0.70** | 0.49 | −0.22 | −0.14 | **0.70** | 0.06 | 2.27 | −0.02 | 0.22 | −0.59 | 1.17 | ***−1.79*** | 0.09 |
| 406 | Surkhet | 28.587 | 81.635 | 720 | −0.96 | 0.33 | −0.70 | −0.07 | 0.03 | 0.43 | 0.07 | −0.67 | −0.02 | 0.00 | 0.15 | 0.93 | −0.45 | −0.22 |
| 504 | Libang gaun | 28.3 | 82.633 | 1270 | −3.49 | −0.03 | 0.33 | 0.04 | −0.09 | 0.45 | −0.05 | −5.90 | 0.05 | −0.25 | −0.78 | −3.37 | −0.60 | −0.11 |
| 511 | Salyan bazar | 28.383 | 82.167 | 1457 | ***−4.58*** | −0.64 | −0.86 | 0.00 | −0.04 | 0.22 | −0.03 | −3.41 | 0.00 | ***−0.29*** | −0.37 | −1.42 | **−0.57** | −0.44 |
| **Field Significance of WM** | | | | | | 7.20 | 0.90 | 1.40 | * | −0.20 | 0.80 | * | 7.40 | 0.10 | −0.80 | * | 7.30 | −1.33 | −1.48 |
| **CL** | 703 | Butwal | 27.694 | 83.466 | 205 | −9.77 | ***−3.22*** | −4.17 | −0.22 | −0.10 | 0.50 | −0.12 | −8.52 | 0.00 | −0.70 | 1.25 | −9.63 | ***−2.01*** | −0.19 |
| 902 | Rampur | 27.654 | 84.351 | 169 | −2.65 | −0.83 | −0.83 | 0.05 | 0.07 | **0.75** | −0.07 | 2.57 | 0.04 | 0.00 | 2.78 | 1.32 | −1.00 | −0.12 |
| 903 | Jhawani | 27.591 | 84.522 | 177 | 3.38 | 0.42 | −0.12 | −0.09 | 0.10 | ***0.54*** | **−0.15** | 0.32 | **0.09** | **−0.52** | 2.01 | 0.36 | −0.92 | −0.01 |
| 907 | Amlekhganj | 27.281 | 84.992 | 310 | −5.33 | −0.41 | 0.28 | **−0.22** | 0.00 | **2.35** | ***−0.19*** | **−9.41** | ***0.37*** | ***−1.57*** | 0.22 | **−7.82** | ***−2.05*** | −0.38 |
| 909 | Simara airport | 27.164 | 84.98 | 137 | −0.74 | −0.36 | 0.73 | −0.01 | −0.03 | 0.31 | **0.11** | −3.05 | 0.03 | 0.00 | −0.37 | 1.38 | **−0.59** | −0.57 |
| 910 | Nijgadh | 27.183 | 85.167 | 244 | −5.12 | 0.63 | 0.18 | 0.00 | −0.12 | −0.26 | 0.00 | −2.36 | ***−0.15*** | ***0.50*** | −0.82 | −5.11 | ***−1.21*** | −0.40 |
| 911 | Parwanipur | 27.079 | 84.933 | 115 | −0.57 | −0.08 | 0.35 | −0.02 | 0.05 | 0.53 | 0.02 | 0.85 | 0.07 | −0.23 | 0.43 | −0.08 | −0.35 | −0.39 |
| 912 | Ramoli bairiya | 27.017 | 85.383 | 152 | −1.93 | −0.43 | −0.04 | −0.01 | −0.12 | **1.09** | 0.00 | −14.02 | 0.07 | ***−0.59*** | −0.77 | −6.78 | −0.73 | −0.29 |
| 1109 | Pattharkot(east) | 27.1 | 85.66 | 162 | −6.57 | −0.86 | −0.98 | **−0.21** | **−0.25** | 0.67 | −0.08 | ***−15.99*** | 0.01 | ***−0.56*** | −0.52 | **−14.13** | **−0.96** | −0.40 |
| 1110 | Tulsi | 27.013 | 85.921 | 251 | 0.77 | 0.22 | 0.52 | 0.00 | −0.02 | 0.60 | 0.00 | 1.62 | 0.09 | −0.24 | 0.53 | 0.80 | −0.73 | −0.40 |
| 1111 | Janakpur airport | 26.711 | 85.924 | 78 | ***10.26*** | ***2.07*** | ***3.58*** | 0.02 | 0.10 | **1.08** | −0.03 | 10.08 | ***0.22*** | −0.24 | ***3.15*** | 6.84 | −0.57 | −0.28 |
| **Field Significance of CL** | | | | | | * | 2.10 | 3.40 | −0.30 | −0.30 | 1.20 | −0.20 | −16.70 | 0.20 | −0.90 | 2.84 | −13.72 | −1.79 | * |
| **CM** | 701 | Ridi bazar | 27.95 | 83.433 | 442 | −0.28 | −0.17 | −0.47 | ***−0.33*** | ***−0.14*** | ***0.62*** | −0.02 | **−9.22** | 0.02 | ***−0.50*** | −1.28 | −5.88 | ***−0.59*** | −0.29 |
| 722 | Musikot | 28.167 | 83.267 | 1280 | ***8.53*** | 0.55 | ***2.22*** | 0.22 | ***0.58*** | ***1.06*** | −0.05 | ***12.79*** | ***0.30*** | ***−0.87*** | 1.83 | **13.87** | ***−1.93*** | −0.15 |
| 802 | Khudi bazar | 28.283 | 84.367 | 823 | −1.35 | ***−0.98*** | −1.06 | 0.00 | **0.26** | 0.42 | 0.00 | 3.59 | 0.02 | −0.13 | 1.62 | −0.67 | ***−1.11*** | 0.21 |
| 804 | Pokhara airport | 28.2 | 83.979 | 827 | 1.50 | 0.26 | 1.26 | −0.09 | −0.16 | 0.00 | −0.02 | −6.91 | −0.02 | −0.09 | 0.02 | 0.37 | −0.60 | −0.29 |
| 807 | Kunchha | 28.133 | 84.35 | 855 | 1.00 | −0.99 | −0.96 | −0.23 | −0.10 | 0.40 | −0.07 | −7.63 | ***0.15*** | ***−0.83*** | −0.50 | 0.75 | −0.72 | 0.16 |
| 808 | Bandipur | 27.942 | 84.406 | 995 | −0.82 | −0.58 | −0.50 | 0.10 | 0.01 | 0.30 | 0.03 | −0.24 | −0.04 | 0.07 | **−1.58** | 2.67 | −0.42 | −0.41 |
| 810 | Chapkot | 27.883 | 83.817 | 460 | −2.36 | −0.36 | −1.76 | 0.00 | −0.03 | 0.36 | 0.00 | −2.88 | −0.06 | 0.08 | −0.76 | 3.09 | −0.80 | 0.09 |
| 814 | Lumle | 28.297 | 83.818 | 1740 | ***16.26*** | 0.13 | −0.25 | **0.22** | 0.06 | 0.08 | 0.39 | 12.64 | 0.10 | 0.08 | 1.17 | 12.77 | −0.63 | 0.70 |
| 904 | Chisapani gadhi | 27.56 | 85.139 | 1729 | −7.64 | −1.57 | −2.41 | −0.19 | −0.10 | 0.73 | **−0.16** | −11.57 | −0.03 | ***−0.58*** | −0.98 | −6.62 | ***−1.05*** | −0.51 |
| 1008 | Nawalpur | 27.813 | 85.625 | 1457 | −2.36 | **−0.43** | −0.11 | 0.17 | 0.10 | 0.62 | −0.18 | 2.66 | −0.01 | 0.01 | 0.98 | −0.08 | −1.02 | 0.36 |
| 1015 | Thankot | 27.688 | 85.221 | 1457 | −5.44 | −0.36 | **−2.05** | ***−0.90*** | ***−0.40*** | 0.24 | −0.27 | ***−21.88*** | ***−0.16*** | 0.06 | −1.47 | **−13.69** | ***−1.33*** | −0.15 |
| 1022 | Godavari | 27.593 | 85.379 | 1527 | ***−5.40*** | **−0.56** | **−1.36** | **−0.25** | −0.09 | 0.00 | −0.08 | ***−10.60*** | −0.02 | ***−0.54*** | 0.39 | **−12.12** | −0.40 | −0.36 |
| 1023 | Dolal ghat | 27.639 | 85.705 | 659 | 0.13 | 0.08 | −0.60 | −0.16 | ***−0.15*** | 0.55 | 0.08 | −5.31 | −0.02 | −0.22 | −0.93 | **−5.48** | 0.04 | −0.28 |
| 1029 | Khumaltar | 27.652 | 85.326 | 1334 | −1.82 | −0.41 | −0.86 | −0.17 | −0.04 | 0.49 | 0.00 | −3.17 | 0.00 | −0.12 | 0.58 | −1.49 | −0.35 | 0.00 |
| 1030 | Kathmandu airport | 27.704 | 85.373 | 1337 | 0.40 | −0.10 | 0.07 | 0.01 | **0.13** | **0.70** | 0.02 | 2.99 | 0.03 | −0.03 | 0.84 | 1.97 | ***−0.86*** | 0.01 |
| 1115 | Nepalthok | 27.42 | 85.849 | 698 | −1.78 | **−0.84** | **−1.63** | −0.23 | −0.12 | 0.92 | 0.00 | −4.38 | ***−0.18*** | 0.30 | −0.71 | −4.18 | 0.00 | −0.39 |
| **Field Significance of CM** | | | | | | −19.00 | −0.90 | −2.60 | −0.70 | * | 0.80 | * | −18.40 | * | −0.70 | * | −12.10 | −1.20 | * |
| **CH** | 601 | Jomsom | 28.78 | 83.72 | 2744 | −0.68 | −0.28 | −0.15 | 0.05 | 0.00 | −0.13 | 0.00 | 0.69 | 0.00 | ***0.38*** | 0.68 | 0.69 | −0.10 | 0.56 |
| 604 | Thakmarpha | 28.739 | 83.681 | 2655 | 1.03 | 0.14 | −0.13 | −0.01 | 0.04 | 0.22 | 0.00 | 1.21 | 0.02 | 0.15 | **0.66** | 0.44 | ***−0.69*** | 0.38 |
| 607 | Lete | 28.633 | 83.609 | 2490 | ***5.72*** | ***0.87*** | ***0.98*** | 0.15 | ***0.16*** | −0.08 | ***0.19*** | ***11.43*** | 0.01 | ***1.04*** | ***4.23*** | ***8.36*** | −0.24 | 1.50 |
| **Field Significance of CH** | | | | | | 5.40 | 0.80 | 1.00 | 0.20 | 0.20 | * | 0.20 | 12.90 | * | 1.10 | 2.33 | 9.54 | * | * |
| **EL** | 1112 | Chisapani bazar | 26.93 | 86.145 | 107 | 0.08 | −0.60 | 0.40 | ***−0.25*** | −0.03 | **1.45** | −0.05 | −2.19 | ***0.28*** | ***−0.70*** | ***−1.03*** | 2.87 | ***−1.37*** | **−0.58** |
| 1213 | Udayapur gadhi | 26.933 | 86.517 | 1175 | ***−16.25*** | ***−2.31*** | ***−4.51*** | −0.17 | 0.00 | 0.21 | −0.08 | ***−12.24*** | −0.05 | ***−0.53*** | −0.50 | ***−9.33*** | ***−2.50*** | −0.50 |
| 1216 | Siraha | 26.656 | 86.212 | 102 | 1.22 | 0.80 | 0.80 | −0.05 | −0.05 | 0.43 | 0.05 | 0.40 | −0.04 | 0.30 | ***2.81*** | −3.04 | −0.60 | −0.15 |
| 1311 | Dharan bazar | 26.792 | 87.285 | 310 | −9.03 | −0.69 | −0.79 | **−0.21** | ***−0.35*** | 0.10 | ***−0.23*** | ***−17.94*** | −0.05 | ***−0.32*** | 1.38 | **−14.41** | −0.73 | −0.02 |
| 1316 | Chatara | 26.82 | 87.159 | 105 | 0.38 | −0.56 | −1.21 | 0.02 | −0.10 | 0.33 | 0.00 | −2.92 | 0.01 | −0.13 | ***3.88*** | −6.23 | 0.41 | 0.04 |
| 1319 | Biratnagar airport | 26.481 | 87.264 | 72 | −0.40 | −0.31 | 0.03 | 0.00 | 0.05 | 0.45 | 0.00 | 1.32 | 0.02 | 0.11 | **1.98** | 1.85 | **−0.80** | −0.24 |
| 1320 | Tarahara | 26.699 | 87.279 | 121 | 1.86 | −0.42 | −0.24 | 0.08 | **0.18** | 0.31 | **−0.07** | 6.80 | ***0.10*** | −0.06 | ***3.80*** | 3.17 | −0.10 | 0.49 |
| 1408 | Damak | 26.671 | 87.703 | 119 | −4.15 | −0.40 | −1.46 | **−0.25** | −0.11 | **0.87** | ***−0.15*** | −10.58 | 0.05 | ***−0.65*** | 1.35 | −5.80 | ***−0.86*** | −0.30 |
| 1409 | Anarmani birta | 26.625 | 87.989 | 122 | 5.15 | 0.08 | 2.14 | 0.00 | −0.01 | −0.08 | −0.07 | 10.52 | −0.04 | **0.38** | 1.49 | 6.16 | 0.61 | 0.02 |
| **Field Significance of EL** | | | | | | * | * | * | −0.20 | −0.30 | 1.00 | −0.20 | −14.90 | 0.10 | −0.50 | 3.20 | −11.43 | −3.03 | * |
| **EM** | 1102 | Charikot | 27.667 | 86.05 | 1940 | 1.97 | −0.12 | 0.36 | −0.10 | 0.03 | 0.13 | −0.20 | −0.51 | 0.04 | −0.16 | −0.97 | 2.89 | ***−0.96*** | −0.27 |
| 1103 | Jiri | 27.633 | 86.233 | 2003 | ***6.61*** | ***0.60*** | **1.18** | **0.21** | 0.14 | 0.25 | −0.31 | 8.39 | ***0.08*** | −0.39 | 0.28 | ***11.08*** | −0.69 | −0.26 |
| 1202 | Chaurikhark | 27.7 | 86.717 | 2619 | 0.42 | −0.04 | 0.67 | −0.05 | 0.10 | **0.71** | 0.31 | 3.58 | 0.07 | ***−0.50*** | 0.47 | 4.39 | ***−2.22*** | −0.88 |
| 1203 | Pakarnas | 27.443 | 86.569 | 1944 | 4.16 | 0.24 | ***1.28*** | 0.00 | 0.06 | 0.83 | 0.00 | 2.61 | ***0.08*** | **−0.50** | 0.07 | 1.25 | **−0.82** | −0.41 |
| 1204 | Aisealukhark | 27.36 | 86.749 | 2063 | −8.36 | ***−1.04*** | −0.49 | 0.18 | −0.08 | −0.49 | ***0.40*** | −2.97 | −0.17 | ***0.78*** | −2.21 | −2.43 | −1.61 | 0.16 |
| 1206 | Okhaldhunga | 27.308 | 86.504 | 1731 | 2.47 | −0.14 | −0.02 | −0.09 | 0.00 | 0.38 | 0.00 | 0.04 | 0.02 | −0.14 | 0.88 | 0.47 | **−0.84** | −0.37 |
| 1207 | Mane bhanjyang | 27.215 | 86.444 | 1528 | −2.27 | −0.51 | −0.88 | −0.08 | −0.13 | −0.15 | 0.00 | −1.52 | −0.04 | −0.02 | 0.02 | 2.57 | ***−0.99*** | −0.38 |
| 1210 | Kurule ghat | 27.136 | 86.43 | 341 | 0.73 | −0.36 | −0.21 | 0.00 | 0.01 | 0.24 | ***0.07*** | 0.54 | 0.06 | −0.07 | 0.51 | −0.57 | −0.08 | −0.41 |
| 1211 | Khotang bazar | 27.029 | 86.843 | 1305 | 0.34 | −0.25 | −1.10 | 0.16 | 0.13 | 0.63 | −0.05 | 1.64 | ***0.19*** | ***−0.89*** | 1.91 | −0.13 | 0.09 | 0.24 |
| 1303 | Chainpur (east) | 27.292 | 87.317 | 1262 | 0.23 | 0.03 | −0.43 | 0.14 | 0.05 | 0.60 | 0.06 | 2.38 | −0.01 | 0.29 | 1.04 | 2.12 | −0.59 | 0.21 |
| 1305 | Leguwa ghat | 27.154 | 87.289 | 444 | −2.22 | ***−0.76*** | ***−0.86*** | ***−0.24*** | −0.07 | 0.53 | −0.05 | ***−6.67*** | −0.02 | **−0.60** | ***−2.38*** | −0.95 | ***−0.92*** | −0.21 |
| 1306 | Munga | 27.05 | 87.244 | 1457 | −3.07 | −0.39 | −0.76 | ***−0.25*** | **−0.10** | 0.46 | 0.00 | ***−8.80*** | −0.01 | ***−0.48*** | −0.70 | ***−4.90*** | ***−0.61*** | −0.36 |
| 1307 | Dhankuta | 26.983 | 87.346 | 1192 | −1.95 | −0.13 | 0.43 | **−0.18** | −0.07 | 0.55 | 0.00 | **−5.03** | −0.01 | ***−0.46*** | 0.24 | −1.61 | **−0.33** | −0.24 |
| 1308 | Mul ghat | 26.932 | 87.32 | 286 | −0.02 | 0.15 | 0.86 | −0.08 | −0.09 | 0.33 | 0.04 | −0.87 | −0.06 | 0.10 | 0.72 | 1.37 | −0.15 | 0.53 |
| 1309 | Tribeni | 26.914 | 87.16 | 146 | −2.66 | −0.67 | 0.52 | 0.11 | 0.16 | −0.12 | 0.00 | −0.50 | −0.02 | −0.19 | 1.56 | 0.39 | −0.93 | 0.29 |
| 1322 | Machuwaghat | 26.938 | 87.155 | 168 | −1.37 | −0.29 | −1.78 | 0.07 | 0.31 | 0.36 | 0.01 | 14.30 | 0.08 | 0.15 | 0.46 | −5.10 | ***−0.84*** | 0.15 |
| 1325 | Dingla | 27.353 | 87.146 | 1169 | 3.38 | −0.20 | −0.47 | 0.08 | 0.12 | 0.30 | −0.04 | 6.95 | ***0.16*** | ***−0.58*** | −1.50 | 2.04 | **−1.25** | 0.10 |
| 1403 | Lungthung | 27.55 | 87.783 | 1780 | ***7.18*** | 0.10 | 0.17 | 0.07 | 0.10 | 0.00 | 0.13 | 4.63 | 0.05 | −0.15 | 0.89 | 2.31 | −0.98 | −0.24 |
| 1410 | Himali gaun | 26.887 | 88.027 | 1654 | −4.98 | −0.36 | −0.52 | 0.02 | 0.05 | ***0.46*** | 0.13 | −4.07 | 0.01 | −0.18 | 1.59 | −0.36 | −0.18 | 0.01 |
| **Field Significance of EM** | | | | | | −8.10 | −1.20 | * | −0.20 | * | 0.70 | 0.30 | −6.90 | 0.10 | −0.60 | * | * | −1.64 | - |
| Positive trend (%) | | | | | | 49 | 38 | 43 | 30 | 41 | 80 | 33 | 49 | 62 | 30 | 62 | 55 | 7 | 30 |
| Negative trend (%) | | | | | | 51 | 62 | 57 | 57 | 49 | 16 | 41 | 51 | 38 | 67 | 38 | 45 | 92 | 68 |
| No Trend (%) | | | | | | 0 | 0 | 0 | 13 | 11 | 4 | 26 | 0 | 0 | 3 | 0 | 0 | 1 | 1 |
| Significant positive trend (%) | | | | | | 16 | 8 | 9 | 3 | 9 | 22 | 9 | 7 | 18 | 8 | 12 | 7 | 0 | 0 |
| Significant negative trend (%) | | | | | | 4 | 11 | 7 | 16 | 9 | 0 | 11 | 13 | 5 | 33 | 4 | 11 | 41 | 4 |

Note: WL (western lowlands), WM (western middle mountains and hills), WH (western high mountains), CL (central lowlands), CM (central middle mountains and hills), CH (central high mountains, EL (eastern lowlands), EM (eastern middle mountains and hills) and EH (eastern high mountains)). Bold italics indicates significance at 0 to 0.05 and bold only indicates significance at 0.06 to 0.1, * indicates insignificant field.
